# 1 Inferring invasion determinants

2 with mechanistic models and multitype samples

3 M. Saubin<sup>1</sup>, J. Coville<sup>2</sup>, C. Xhaard<sup>1,2,3</sup>, P. Frey<sup>1</sup>, S. Soubeyrand<sup>2</sup>, F. Halkett<sup>1</sup> and F. Fabre<sup>4</sup>

4 <sup>1</sup> Université de Lorraine, INRAE, IAM, F-54000 Nancy, France

5 <sup>2</sup> INRAE, BioSP, 84914 Avignon, France

6 <sup>3</sup> Université de Lorraine, INSERM CIC-P 1433, CHRU de Nancy, INSERM U1116, Nancy, France.

7 <sup>4</sup> INRAE, Bordeaux Sciences Agro, SAVE, F-33882 Villenave d'Ornon, France

## 8 Abstract

9 **1-** Dispersal, and in particular the frequency of long-distance dispersal (LDD) events, has strong implications  
10 for population dynamics, with possibly the acceleration of the colonisation front, and evolution, with possibly  
11 the conservation of genetic diversity along the colonised domain. However, accurately inferring LDD is  
12 challenging as it requires both large-scale data and a methodology that encompasses the redistribution of  
13 individuals in time and space.

14 **2-** Here, we propose a mechanistic-statistical framework to estimate dispersal of one-dimensional invasions.  
15 The mechanistic model takes into account population growth and grasps the diversity in dispersal processes  
16 by using either diffusion, leading to a reaction-diffusion (R.D.) formalism, or kernels, leading to an integro-  
17 differential (I.D.) formalism. The ID formalism considers different dispersal kernels (*e.g.* Gaussian, Expo-  
18 nential, and Exponential-power) differing in their frequency of LDD events. The statistical model relies on  
19 dedicated observation laws that describe two types of samples possibly gathered in space and time during the  
20 invasion (an overall survey and/or a refined examination of clumped samples) while taking into account the  
21 variability in both habitat suitability and occupancy perception.

22 **3-** We first check the identifiability of the parameters and the confidence in the selection of the dispersal pro-  
23 cess. We observed good identifiability for nearly all parameters (Correlation Coefficient  $> 0.95$  between true  
24 and fitted values), except for occupancy perception (Correlation Coefficient =  $0.83 - 0.85$ ). The Exponential-  
25 Power (*i.e.* fat-tailed) kernel is the dispersal process most confidently identified. We then applied our frame-  
26 work to data describing an annual invasion of the poplar rust disease along the Durance River valley over  
27 nearly 200 km. This spatio-temporal survey consisted of 12 study sites examined at seven time points. We  
28 confidently estimated that the dispersal of poplar rust is best described by an Exponential-power kernel with  
29 a mean dispersal distance of 2.01 km and an exponent parameter of 0.24 characterising a fat-tailed kernel  
30 with frequent LDD events.

31 **4-** By considering the whole range of possible dispersal processes our method forms a robust inference method.  
32 It can be employed for a variety of organisms provided they are monitored in time and space along a one-  
33 dimension invasion.

## <sup>34</sup> **Keywords**

<sup>35</sup> Long-distance dispersal, mechanistic-statistical model, Multiple data types,

## 36 1 Introduction

37 Dispersal is key in ecology and evolutionary biology (Clobert et al., 2004). From an applied point of view,  
38 the knowledge of dispersal is of prime interest for designing ecological-based management strategies in a wide  
39 diversity of contexts ranging from the conservation of endangered species (*e.g.*, Macdonald and Johnson,  
40 2001) to the mitigation of emerging epidemics (Dybiec et al., 2009; Fabre et al., 2021). From a theoretical  
41 point of view, the pattern and strength of dispersal sharply impact eco-evolutionary dynamics (*i.e.* the recip-  
42 rocal interactions between ecological and evolutionary processes) (Miller et al., 2020). Typically, besides the  
43 mean dispersal abilities, the finer features of dispersal have many implications for population dynamics (*e.g.*  
44 speed of invasion, metapopulation turnover; Soubeyrand et al., 2015; Kot et al., 1996), genetic structure (*e.g.*  
45 gene diversity, population differentiation; Edmonds et al., 2004; Fayard et al., 2009; Petit, 2011) and local  
46 adaptation (Gandon and Michalakis, 2002; Hallatschek and Fisher, 2014). Mathematically, the movement of  
47 dispersers (individuals, spores or propagules for example) can be described by a so-called location dispersal  
48 kernel (Nathan et al., 2012) that represents the statistical distribution of the locations of the propagules of  
49 interest after dispersal from a source point. Since the pioneer works of Mollison (1977), much more attention  
50 has been paid to the fatness of the tail of the dispersal kernel. When, at a relatively large distance, the shape  
51 of the tail of a kernel decreases less or equally slowly than an exponential distribution, the kernel is termed  
52 short-tailed (also referred to as thin-tailed). If it decreases more slowly, the kernel is termed long-tailed (also  
53 referred to as fat-tailed) (Klein et al., 2006). In this case, long-distance dispersal (LDD) events are more  
54 frequent than with an exponential kernel that shares the same mean dispersal distance. The frequency of  
55 LDD events has consequences on both population dynamics and genetic structure. Short-tailed dispersal  
56 kernels generate an invasion front of constant velocity, whereas long-tailed kernels cause an accelerating front  
57 of colonisation (Ferrandino, 1993; Kot et al., 1996; Clark et al., 2001; Mundt et al., 2009; Hallatschek and  
58 Fisher, 2014). Frequent LDD events can also cause a reshuffling of alleles along the colonisation gradient,  
59 which prevents the erosion of genetic diversity (Nichols and Hewitt, 1994; Petit, 2004; Fayard et al., 2009) or  
60 leads to patchy population structures (Ibrahim et al., 1996; Bialozyt et al., 2006).

61

62 Despite being a major issue in biology, properly characterising the dispersal kernels is a challenging task

63 for many species, especially when dispersing individuals are numerous, small (and thus difficult to track) and  
64 move far away (Nathan, 2001). This is typically the case of plant pathogens for which dispersal kernels have  
65 rarely been assessed (Fabre et al., 2021) despite their major impact on food security and ecosystems (Strange  
66 and Scott, 2005; Savary et al., 2019). Three approaches can be distinguished to infer dispersal (Nathan et al.,  
67 2003; Rieux et al., 2014). The first class of methods uses the indirect effect of dispersal on the pattern of genetic  
68 differentiation among populations to estimate dispersal parameters. Most of them only estimate an average  
69 dispersal distance or a diffusion rate (Broquet and Petit, 2009; Roques et al., 2016). The second class enables  
70 to infer the entire shape of the dispersal kernel by directly observing dispersal with dedicated experiments  
71 tracking the movement of tagged individuals, thanks to particular morphological structures or genetic markers.  
72 They often rely on heavy experimental procedures for data acquisition, requiring for example to control for the  
73 source strength and location (Soubeyrand et al., 2007; Rieux et al., 2014). The third class of methods make  
74 use of specific mathematical modelling to infer dispersal from observations of ongoing dynamics (Soubeyrand  
75 et al., 2009a; Rieux et al., 2013; Bousset et al., 2015; Grosdidier et al., 2018). If phenomenological models can  
76 hardly disentangle the observed data from the dispersal process *per se*, mechanistic-statistical models do so  
77 and enable a proper inference of dispersal using spatio-temporal datasets (Wikle, 2003a; Soubeyrand et al.,  
78 2009a; Roques et al., 2011; Soubeyrand and Roques, 2014; Hefley et al., 2017; Nembot Fomba et al., 2021).  
79 These models allow for the parsimonious representation of both growth and dispersal processes in heterogenous  
80 environments (Papaïx et al., 2022). They require detailed knowledge of the biology of the species of interest to  
81 properly model the invasion process. They combine a mechanistic model describing the invasion process and a  
82 probabilistic model describing the observation process while enabling a proper inference using spatio-temporal  
83 data.

84 Classically, the dynamics of large populations are well described by deterministic differential equations.  
85 Following the seminal work of Fisher on the spread of a mutant gene in a given population (Fisher, 1937),  
86 invasions have often been modelled through reaction-diffusion equations (Murray, 2002; Okubo and Levin,  
87 2002; Shigesada and Kawasaki, 1997). In this setting, individuals are assumed to move randomly in their  
88 environment. Their trajectories are modelled using a Brownian motion or a more general stochastic diffusion  
89 process. Whereas reaction-diffusion equations have been classically used to describe biological invasions, their

90 incorporation into mechanistic-statistical approaches to estimate parameters of interest from spatio-temporal  
91 data essentially dates back to the early 2000s. Examples include the study of the invasion processes of  
92 the House Finch bird over the eastern United States (Wikle, 2003a), the pine processionary moth in France  
93 (Roques et al., 2011; Soubeyrand and Roques, 2014), the wolf in Eastern France (Louvrier et al., 2020) and the  
94 spread of the black pod disease in a cocoa plot (Nembot Fomba et al., 2021). By contrast to reaction-diffusion  
95 equations, integro-differential equations rely on dispersal kernels, individuals being redistributed according  
96 to the considered kernel (Fife, 1996; Hutson et al., 2003; Kolmogorov et al., 1937). This approach allows to  
97 consider a large variety of dispersal functions, typically with either a short or a long tail (*i.e.* putative LDD  
98 events). As such it is more likely to model accurately the true organisms dispersal process. However, as far  
99 as we know, integro-differential equations have rarely been embedded into mechanistic-statistical approaches  
100 to infer dispersal processes in ecology (but see Szymańska et al., 2021 for a recently proposed application of  
101 a non-local model to cell proliferation).

102

103 Data acquisition is another challenge faced by biologists in the field, all the more that data confined to  
104 relatively small spatial scales can blur the precise estimates of the shape of the kernels tail (Ferrandino, 1996;  
105 Kuparinen et al., 2007; Rieux et al., 2014). To gather as much information as possible, it is mandatory to  
106 collect data over a wide range of putative population sizes (from absence to near saturation) along the region  
107 of interest. In turn, the practical implementation of such a sampling scheme may be difficult to grasp from a  
108 single data type as one faces a trade-off in data acquisition between a large-scale monitoring (*e.g.* the screening  
109 of a large number of putative habitat units to test for presence/absence, thereafter raw samples) and, when  
110 present, a small-scale observation (*e.g.* the focusing on a reduced number of habitat units to estimate more  
111 precisely local population sizes and individual aggregation, thereafter refined samples). Sharing the sampling  
112 effort between raw and refined samples to browse through the propagation front may improve the inference of  
113 spatial ecological processes (Gotway and Young, 2002). Furthermore, the probabilistic model describing the  
114 observation process in the mechanistic-statistical approach can handle such multiple datasets with varying  
115 supports (Wikle, 2003b). However, inference based on multi-type data remains a challenging statistical issue  
116 as the observation variables describing each data type follow different distribution laws (Chagneau et al.,

117 2011) and can be correlated or, more generally, dependent because they are governed by the same underlying  
118 dynamics (Bourgeois et al., 2012; Georgescu et al., 2014; Soubeyrand et al., 2018). This requires careful  
119 definition of the conditional links between the observed variables and the model parameters (the so-called  
120 observation laws) in order to identify and examine complementarity and possible redundancy between the  
121 data types.

122

123 In this article, we aim to provide a sound and unified inferential framework to estimate dispersal from  
124 ecological invasion data using both reaction-diffusion and integro-differential equations. For the sake of sim-  
125 plicity we focus on one-dimensional invasions, but our approach can be extended to 2D-analyses as well. We  
126 first define the two classes of mechanistic invasion models, establish the observation laws corresponding to raw  
127 and refined samplings, and propose a maximum-likelihood method to estimate their parameters within the  
128 same inferential framework. Then, to confirm that each model parameter can indeed be efficiently estimated  
129 given the amount of data at hand (see Soubeyrand and Roques, 2014), we perform a simulation study to check  
130 model-parameters identifiability given a proposed experimental design. We also aim to assess the confidence  
131 level in the choice of the dispersal function as derived by model selection. Last, the inferential framework  
132 is applied to original ecological data describing the annual invasion of a tree pathogen (*Melampsora larici-*  
133 *populina*, a fungus species responsible for the poplar rust disease) along the riparian stands of wild poplars  
134 bordering the Durance River valley in the French Alps (Xhaard et al., 2012).

## 135 **2 Modelling one-dimensional invasion and observation processes**

### 136 **2.1 A class of deterministic and mechanistic invasion models**

137 In this study, we model the dynamics of a population density  $u(t, x)$  at any time  $t$  and point  $x$  during an  
138 invasion using two types of spatially heterogeneous deterministic models allowing to represent a wide range of  
139 dispersal processes. Specifically, we considered a reaction-diffusion model (R.D.) and an integro-differential  
140 model (I.D.):

$$\begin{aligned}
 & \text{R.D.} \left\{ \begin{array}{l} \partial_t u(t, x) = D \partial_{xx} u(t, x) + r(x) u(t, x) \left(1 - \frac{u(t, x)}{K}\right), \\ u(0, x) = u_0(x), \end{array} \right. \quad \text{I.D.} \left\{ \begin{array}{l} \partial_t u(t, x) = \int_{-R}^R J(x-y) [u(t, y) - u(t, x)] dy + r(x) u(t, x) \left(1 - \frac{u(t, x)}{K}\right), \\ u(0, x) = u_0(x). \end{array} \right.
 \end{aligned}$$

where  $t$  varies in  $[0, T]$  (*i.e.* the study period) and  $x$  varies in  $[-R, R]$  (*i.e.* the study domain). Both equations exhibit the same structure composed of a diffusion/dispersal component and a reaction component. The reaction component,  $r(x)u(t, x) \left(1 - \frac{u(t, x)}{K}\right)$  in both equations, is parameterised by a spatial growth rate  $r(x)$  that takes into account macro-scale variations of the factors regulating the population density and  $K$  the carrying capacity of the environment. It models population growth. The diffusion/dispersal component models population movements either by a diffusion process ( $D\partial_{xx}u$  in R.D.) parameterised by the diffusion coefficient  $D$  or by a dispersal kernel ( $J$  in I.D.) depending on a specific set of parameters (see below). To cover a large spectrum of possible dispersal processes, we use the following parametric form for the kernel  $J$ :

$$J := \frac{\tau}{2\alpha\Gamma\left(\frac{1}{\tau}\right)} e^{-\left|\frac{x}{\alpha}\right|^\tau}$$

with mean dispersal distance  $\lambda := \alpha \frac{\Gamma\left(\frac{2}{\tau}\right)}{\Gamma\left(\frac{1}{\tau}\right)}$ . Varying the value of  $\tau$  leads to kernels classically used in dispersal studies. Specifically,  $J$  can be a Gaussian kernel ( $\tau = 2, \lambda = \alpha/\sqrt{\pi}$ ), an exponential kernel ( $\tau = 1, \lambda = \alpha$ ) or a fat-tail kernel ( $\tau < 1, \lambda = \alpha\Gamma\left(\frac{2}{\tau}\right)/\Gamma\left(\frac{1}{\tau}\right)$ ). Explicit formulas for the solution  $u(t, x)$  of these reaction-diffusion/dispersal equations being out of reach, we compute a numerical approximation  $u_{\text{num}}$  of  $u$  which serves as a surrogate for the real solution. Details of the numerical scheme used to compute  $u_{\text{num}}$  can be found in Appendix A.

## 2.2 A conditional stochastic model to handle micro-scale fluctuations

Among the factors driving population dynamics, some are structured at large spatial scales (macro-scale) and others at local scales (micro-scale). Both scales may be considered when studying biological invasions. In the model just introduced, the term  $r(x)$  describes factors impacting population growth rate at the macro-scale along the whole spatial domain considered. Accordingly, the function  $u(t, x)$  is a mean-field approximation of the true population density at macro-scale. Furthermore, the population density can fluctuate due to micro-scale variations of other factors regulating population densities (*e.g.* because of variations in the micro-



156 climate and the host susceptibility). To take into account such local fluctuations, the deterministic invasion  
157 model is combined with a conditional probability distribution of the local population size in a habitat unit.  
158 The habitat unit is typically a small fraction of the total habitat. This distribution is conditional on  $u(t, x)$ ,  
159 the macro-scale population density, and depends on the (unobserved) suitability of the habitat unit. The  
160 following paragraphs detail this dependence.

161 Consider a habitat unit  $i$  whose centroid is located at  $x_i$ , and suppose that the habitat unit is small enough  
162 to reasonably assume that  $u(t, x) = u(t, x_i)$  for all location  $x$  in the habitat unit. Let  $N_i(t)$  denote the number  
163 of individuals in  $i$  at time  $t$ . The conditional distribution of  $N_i(t)$  is modelled by a Poisson distribution:

$$N_i(t) \mid u(t, x_i), R_i(t) \sim \text{Poisson}(u(t, x_i)R_i(t)), \quad (1)$$

164 where  $R_i(t)$  is the intrinsic propensity of the habitat unit  $i$  to be occupied by individuals of the population  
165 at time  $t$ . Thereafter,  $R_i(t)$  is called habitat suitability and takes into account factors like the exposure and  
166 the favorability of habitat unit  $i$ . The suitability of habitat unit  $i$  is a random effect (unobserved variable)  
167 and is assumed to follow a Gamma distribution with shape parameter  $\sigma^{-2}$  and scale parameter  $\sigma^2$ :

$$R_i(t) \sim \text{Gamma}(\sigma^{-2}, \sigma^2). \quad (2)$$

168 This parameterisation implies that the mean and variance of  $R_i(t)$  are 1 and  $\sigma^2$ , respectively; that the  
169 conditional mean and variance of  $N_i(t)$  given  $u(t, x_i)$  are  $u(t, x_i)$  and  $u(t, x_i) + u(t, x_i)^2\sigma^2$ , respectively; and  
170 that its conditional distribution is:

$$N_i(t) \mid u(t, x_i) \sim \text{Negative-Binomial} \left( \sigma^{-2}, \frac{u(t, x_i)\sigma^2}{1 + u(t, x_i)\sigma^2} \right). \quad (3)$$

### 171 **2.3 Multi-type sampling and models for the observation processes**

172 During an invasion, the population density may range from zero (beyond the front) to the maximum carrying  
173 capacity of the habitat. To optimise the sampling effort, it may be relevant to carry out different sampling  
174 procedures depending on the population density at the sampling sites. In this article, we consider a two-stage

175 sampling made of one raw sampling which is systematic and one optional refined sampling adapted to our case  
176 study, the downstream spread of a fungal pathogen along a river. We consider that the habitat unit is a leaf.  
177 The fungal population is monitored in sampling sites  $s \in \{1, \dots, S\}$  and at sampling times  $t \in \{t_1, \dots, t_K\}$ .  
178 Sampling sites are assumed to be small with respect to the study region and the duration for collecting one  
179 sample is assumed to be short with respect to the study period. Thus, the (macro-scale) density of the  
180 population at sampling time  $t$  in sampling site  $s$  is constant and equal to  $u(t, z_s)$  where  $z_s$  is the centroid of  
181 the sampling site  $s$  and  $u$  satisfies the R.D. or I.D. equation. Any sampling site  $s$  is assumed to contain a  
182 large number of leaves which are, as a consequence of the assumptions made above, all associated with the  
183 same population density function:  $u(t, x_i) = u(t, z_s)$  for all leaves  $i$  within sampling site  $s$ .

184 The raw sampling is focused on trees, considered as a group of independent leaves. In each sampling  
185 site  $s$  and at each sampling time  $t$ , a number  $B_{st}$  of trees is monitored for the presence of infection. We  
186 count the number of infected trees  $Y_{st}$  among the total number  $B_{st}$  of observed trees. In the simulations  
187 and the case study tackled below, the random variables  $Y_{st}$  given  $u(t, x_s)$  are independent and distributed  
188 under the conditional probability distribution  $f_{st}^{\text{raw}}$  described in Appendix B.2. The distribution  $f_{st}^{\text{raw}}$  is a  
189 Binomial distribution. Its success probability depends on two parameters. It depends first on the variability  
190 of the biological process, through the variance parameter  $\sigma^2$  of habitat suitabilities. It also depends on the  
191 variability of the observation process, through a parameter  $\gamma$  describing how the probabilities of leaf infection  
192 perceived by the person in charge of the sampling differ between trees from true probabilities (as informed by  
193 the mechanistic model). Such differences may be due for example to the specific configuration of the canopy  
194 of each tree or to particular lighting conditions.

195 The refined sampling is focused on twigs, considered as a group of connected leaves. Nearby leaves often  
196 encounter the same environmental conditions and, therefore, are characterised by similar habitat suitabilities  
197 represented by  $R_i(t)$ ; see Equations (1-2). This spatial dependence was taken into account by assuming  
198 that the leaves of the same twig (considered as a small group of spatially connected leaves) share the same  
199 leaf suitability. Accordingly, suitabilities are considered as shared random effects. The refined sampling is  
200 performed depending on disease prevalence and available time. In site  $s$  at time  $t$ ,  $G_{st}$  twigs are collected.  
201 For each twig  $g$ , the total number of leaves  $M_{stg}$  and the number of infected leaves  $Y_{stg}$  are counted. In

202 the simulations and the case study tackled below, the random variables  $Y_{stg}$  given  $u(t, x_s)$  are independent  
 203 and distributed under conditional probability distributions denoted by  $f_{st}^{ref}$  described in Appendix B.3. The  
 204 distribution  $f_{st}^{ref}$  is a new mixture distribution (called Gamma-Binomial distribution) obtained using Equations  
 205 (1–2) and taking into account the spatial dependence and the variance parameter of unobserved suitabilities  
 206 (see Appendix B.3).

207 This sampling scheme and its vocabulary (leaves, twigs and trees) is specifically adapted to our case  
 208 study for the sake of clarity. However, a wide variety of multi-type sampling strategies can be defined and  
 209 implemented in the model, as long as it follows a two-stage sampling as presented in Figure 1.

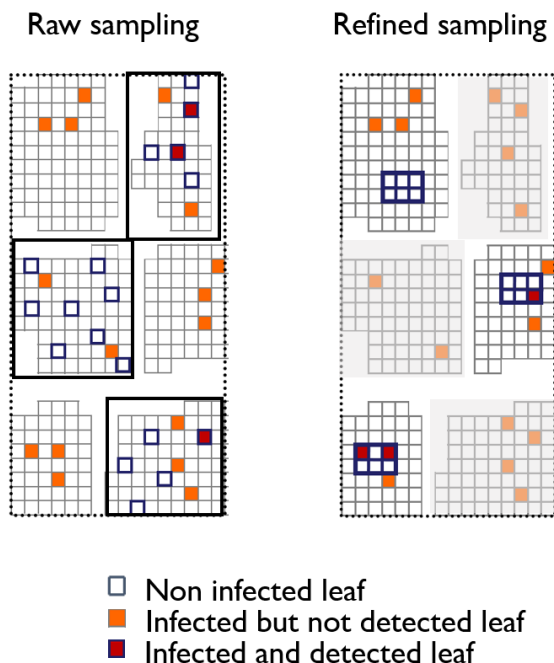

Figure 1: Two-stage sampling on a sampling site, with one systematic raw sampling (on the left) and one optional refined sampling (on the right). Each square represent a leaf, which can be non infected, infected but not detected, or infected and detected. Each group of spatially grouped leaves represent a tree. Each tree already observed during the raw sampling are not available (and thus represented in grey) for the refined sampling, where connected leaves in twigs are observed.

## 210 2.4 Coupling the mechanistic and observation models

211 The submodels of the population dynamics and the observation processes described above can be coupled  
 212 to obtain a mechanistic-statistical model (also called physical-statistical model; Berliner, 2003; Soubeyrand

213 et al., 2009b) representing the data and depending on dynamical parameters, namely the growth and dispersal  
 214 parameters. The likelihood of this mechanistic-statistical model can be written:

$$L(\theta) = \prod_{s=1}^S \prod_{t=t_1}^{t_K} \left\{ f_{st}^{\text{raw}}(Y_{st}) \left( \prod_{g=1}^{G_{st}} f_{stg}^{\text{ref}}(Y_{stg}) \right)^{\mathbf{1}(Y_{st} > \bar{y})} \right\}, \quad (4)$$

215 where expressions of  $f_{st}^{\text{raw}}$  and  $f_{st}^{\text{ref}}$  adapted to the case study tackled below are given by Equations (S10) and  
 216 (S14) in Appendix B. The power  $\mathbf{1}(Y_{st} > \bar{y})$  (that is equal to 1 if  $Y_{st} > \bar{y}$ , 0 otherwise) implies that the  
 217 product  $\prod_{g=1}^{G_{st}} f_{stg}^{\text{ref}}(Y_{stg})$  only appears if the refined sampling is carried out in site  $s$ . Moreover, such a product  
 218 expression for the likelihood is achieved by assuming that leaves in the raw sampling and those in the refined  
 219 sampling are not sampled from the same trees. If this does not hold, then an asymptotic assumption like the  
 220 one in Appendix B.2 can be made to obtain Equation (4), or the dependence of the unobserved suitabilities  
 221 must be taken into account and another likelihood expression must be derived.

### 222 3 Parameter estimation and model selection

223 We performed simulations to check the practical identifiability of several scenarios of biological invasions.  
 224 Invasion scenarios represent a wide range of possible states of nature regarding the dispersal process, the  
 225 environmental heterogeneity at macro-scale and the intensity of local fluctuations at micro-scale. Even though  
 226 the simulations are designed to cope with the structure of our real data set (Appendix D), the results enable  
 227 some generic insights to be gained. Specifically, we considered six sampling dates evenly distributed in time,  
 228 and 12 samplings sites evenly distributed within the 1D spatial domain. For each pair  $(date, site)$ , we  
 229 simulated the raw sampling of 100 trees and the refined sampling of 20 twigs. For the fifth sampling date,  
 230 the raw sampling was densified with 45 sampling sites instead of 12.

231 The simulation study explored four hypotheses for the dispersal process: three I.D. hypotheses with kernels  
 232  $J_{\text{Exp}}$ ,  $J_{\text{Gauss}}$  and  $J_{\text{ExpP}}$  and the R.D. hypothesis. Hypotheses  $J_{\text{Exp}}$  and  $J_{\text{Gauss}}$  state that individuals dispersed  
 233 according to Exponential and Gaussian kernels, respectively, with parameter  $\theta_J = (\lambda)$ . Hypothesis  $J_{\text{ExpP}}$   
 234 states that individuals dispersed according to a fat-tail Exponential-power kernel with parameters  $\theta_J = (\lambda, \tau)$   
 235 and  $\tau < 1$ . Finally, hypothesis R.D. states that individual dispersal is a diffusion process parameterised by

236  $\theta_J = (\lambda)$ . The parameter  $\lambda$  represents the mean distance travelled whatever the dispersal hypothesis con-  
237 sidered. Moreover, macro-scale environmental heterogeneity was accounted for in the simulations by varying  
238 the intrinsic growth rate of the pathogen population ( $r$ ) in space. Specifically, along the one-dimensional  
239 domain, we considered two values of  $r$ , namely a downstream value  $r_{\text{dw}}$  and an upstream value  $r_{\text{up}}$ , paramet-  
240 erised by  $\theta_r = (r_{\text{dw}}, \omega)$  such that  $r_{\text{up}} = r_{\text{dw}}e^\omega$ . Finally, micro-scale heterogeneity was accounted for in the  
241 simulations by varying the parameter of leaf suitability  $\sigma^2$  and tree perception  $\gamma$ . Thereafter,  $\theta = (\theta_r, \theta_J, \gamma, \sigma^2)$   
242 denotes the vector of model parameters.

### 243 **3.1 Accurate inference of model parameters**

244 To assess the estimation method and check if real data that were collected are informative enough to efficiently  
245 estimate the parameters of the models (the so-called practical identifiability), we proceeded in three steps  
246 for each dispersal hypothesis: (i) a set of parameter values  $\theta = (\theta_r, \theta_J, \gamma, \sigma^2)$  is randomly drawn from a  
247 distribution that encompasses a large diversity of realistic invasions, (ii) a data set with a structure similar to  
248 our real sampling is simulated given  $\theta$  and (iii)  $\theta$  is estimated using the maximum-likelihood method applied  
249 to the simulated data set. These steps were repeated  $n = 100$  times. Details on the simulation procedure,  
250 the conditions used to generate realistic invasions and on the estimation algorithm are provided in Appendix  
251 [D.1](#).

252 Practical identifiability was tested by means of correlation coefficients between the true and estimated  
253 parameter values for the four models corresponding to the four dispersal processes (see Table 1, Figures [S2](#),  
254 [S3](#), [S4](#), [S5](#)).

255 All the parameters defining the macro-scale mechanistic invasion model ( $r_{\text{dw}}, \omega, \lambda$ ) display very good  
256 practical identifiability whatever the model, with correlation coefficients above 0.93. In the case of the  
257 Exponential-power dispersal kernel, the additional parameter representing the tail of the distribution ( $\tau$ ) also  
258 displays a very good practical identifiability with a correlation coefficient of 0.95. The parameter defining the  
259 micro-scale fluctuations,  $\sigma^2$ , lead to particularly high correlation coefficients (0.99 for all the models). The  
260 identifiability for the perception parameter  $\gamma$  related to the observation process is somewhat lower (from 0.83  
261 to 0.85).

Table 1: Model practical identifiability. Numbers indicate the coefficient of correlation between the true and estimated parameter values for the four models corresponding to the four dispersal processes ( $J_{\text{Exp}}$ ,  $J_{\text{Gauss}}$ ,  $J_{\text{ExpP}}$  and R.D.) from 100 replicates. High correlation between true and estimated parameters indicates a good practical identifiability. The standard deviations of the coefficients of correlation, estimated with a bootstrapping method, are indicated in brackets. Correlation coefficients and standard deviations are given for natural scale for parameter  $\omega$ , and logarithm scales for parameters  $r_{\text{dw}}$ ,  $\gamma$ ,  $\lambda$ ,  $\tau$ , and  $\sigma^2$ .

| Parameter       | Description                  | $J_{\text{Exp}}$    | $J_{\text{Gauss}}$  | $J_{\text{ExpP}}$   | R.D.                |
|-----------------|------------------------------|---------------------|---------------------|---------------------|---------------------|
| $r_{\text{dw}}$ | Growth rate downstream       | 0.99( $1.10^{-3}$ ) | 0.99( $1.10^{-3}$ ) | 0.99( $2.10^{-3}$ ) | 0.93( $6.10^{-2}$ ) |
| $\omega$        | Growth rate modulator        | 0.99( $< 10^{-3}$ ) | 0.99( $< 10^{-3}$ ) | 0.99( $1.10^{-3}$ ) | 0.99( $1.10^{-3}$ ) |
| $\lambda$       | Mean dispersal distance      | 0.99( $5.10^{-3}$ ) | 0.98( $8.10^{-3}$ ) | 0.99( $1.10^{-3}$ ) | 0.95( $2.10^{-2}$ ) |
| $\tau$          | Kernel exponent              | NA                  | NA                  | 0.95( $1.10^{-2}$ ) | NA                  |
| $\gamma$        | Tree perception              | 0.85( $4.10^{-2}$ ) | 0.83( $4.10^{-2}$ ) | 0.83( $5.10^{-2}$ ) | 0.84( $3.10^{-2}$ ) |
| $\sigma^2$      | Variance in leaf suitability | 0.99( $1.10^{-3}$ ) | 0.99( $< 10^{-3}$ ) | 0.99( $< 10^{-3}$ ) | 0.99( $< 10^{-3}$ ) |

### 3.2 Confidence in the selection of the dispersal process

Numerical simulations were next designed to test whether model selection could disentangle the true dispersal process (*i.e.* the dispersal hypothesis used to simulate the data set) from alternative dispersal processes. We proceeded as indicated for model practical identifiability, except that we fitted to each data set the true model (as previously) but also the three other models corresponding to alternative dispersal hypotheses. We made  $n = 50$  replicates for each of the 16 combinations (four models used for simulation times four models used for estimation). Models were ranked using AIC (Akaike Information Criteria, see Appendix D.2) to select the model best supported by the data set. Confidence level in model selection was assessed by the proportion of cases where the true model was selected according to AIC (Table 2). Recall that, as we only consider  $\tau < 1$  in our numerical simulations (Appendix D.1), the dispersal kernel  $J_{\text{ExpP}}$  is always a fat-tail kernel.

Table 2: Efficiency of model selection using Akaike information criterion (AIC). The four first columns indicate the proportion of cases, among 50 replicates, where each tested model was selected using AIC, given that data sets were generated under a particular model (*i.e.* true model). Column  $d\text{AIC}_{\text{true}}$  (*resp.*  $d\text{AIC}_{\text{wrong}}$ ) indicates the mean difference between the AIC of the model selected when the model selected is the true one (*resp.* when the model selected is not the true model) and the second best model (*resp.* being the true model or not).

| True Model         | Selected Model   |                    |                   |             | $d\text{AIC}_{\text{true}}$ | $d\text{AIC}_{\text{wrong}}$ |
|--------------------|------------------|--------------------|-------------------|-------------|-----------------------------|------------------------------|
|                    | $J_{\text{Exp}}$ | $J_{\text{Gauss}}$ | $J_{\text{ExpP}}$ | R.D.        |                             |                              |
| $J_{\text{Exp}}$   | <b>0.62</b>      | 0.22               | 0.06              | 0.10        | 0.84                        | 0.74                         |
| $J_{\text{Gauss}}$ | 0.34             | <b>0.26</b>        | 0.00              | 0.40        | 1.08                        | 0.55                         |
| $J_{\text{ExpP}}$  | 0.20             | 0.04               | <b>0.70</b>       | 0.06        | <b>89.62</b>                | 0.38                         |
| R.D.               | 0.18             | 0.24               | 0.00              | <b>0.58</b> | 0.71                        | 0.23                         |

272 The model selection procedure is efficient for the dispersal hypotheses Exponential-power  $J_{\text{ExpP}}$ , Expo-  
273 nential  $J_{\text{Exp}}$ , and reaction-diffusion R.D., with 70%, 62% and 58% of correct kernel selection, respectively  
274 (Table 2). When the fat-tail Exponential-power kernel is not correctly identified, it is mostly mistaken with  
275 the Exponential one (for 20% of the simulations). In line with this, the probability of correctly selecting the  
276 kernel  $J_{\text{ExpP}}$  decreases when the parameter  $\tau$  increases towards 1, the value for which the Exponential-power  
277 kernel coincides with the Exponential kernel (Figure 2). Importantly, when the Exponential-power kernel is  
278 correctly selected, we observe a large difference between its AIC and the AIC of the second best model (89.62  
279 points on average). Conversely, when the invasion process is simulated under  $J_{\text{ExpP}}$ , but another kernel is  
280 selected, we observe a very small AIC difference (0.38 point on average). Model selection does not allow  
281 to correctly select the Gaussian kernel  $J_{\text{Gauss}}$  (Table 2). Indeed, with only 26% of correct model selection,  
282 this kernel is not better identified than with a random draw of one of the four models, which would lead to  
283 25% of correct estimations. Its correct identification is greatly improved by densifying the sampling scheme  
284 (Appendix D.5, Table S3). Finally, note that when the invasion process is simulated under model R.D. or  
285  $J_{\text{Gauss}}$ , a short-tail kernel is always selected and, thus, never confounded with the fat-tail kernel  $J_{\text{ExpP}}$ .

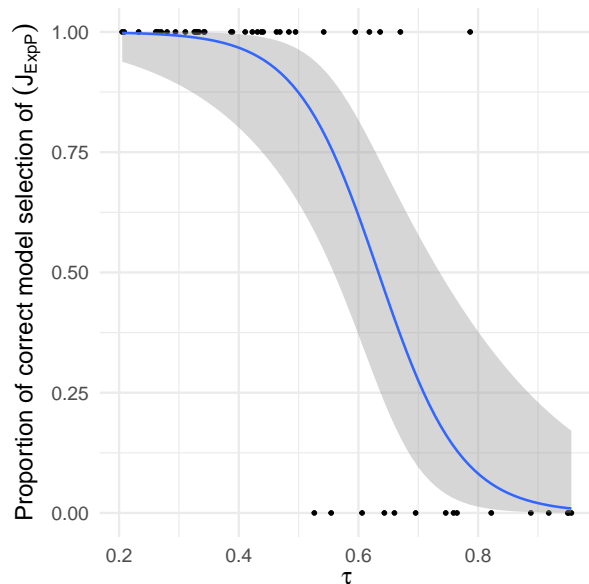

Figure 2: Logistic regression of the proportion of correct model selection of dispersal  $J_{\text{ExpP}}$  as a function of  $\tau$ . Dots represent the values of  $\tau$  used for the 50 replicates of simulated dispersal model  $J_{\text{ExpP}}$ , and the estimated dispersal model (1 for a correct model selection of  $J_{\text{ExpP}}$  and 0 for a wrong model selection). The blue line corresponds to the predicted value of the proportion of correct model selection  $J_{\text{ExpP}}$  as a function of  $\tau$ , and the grey area corresponds to the confidence envelope at 95%.

## 286 4 Case study: Invasion of poplar rust along the Durance River 287 valley

### 288 4.1 Study site

289 We applied our approach to infer the dispersal of the plant pathogen fungus *Melampsora larici-populina*,  
290 responsible for the poplar rust disease, from the monitoring of an epidemic invading the Durance River valley.  
291 Embanked in the French Alps, the Durance River valley constitutes a one-dimension ecological corridor which  
292 channels annual epidemics of the poplar rust pathogen *M. larici-populina* (Xhaard et al., 2012). Each year  
293 the fungus has to reproduce on larches (*Larix decidua*) that are located in the upstream part of the valley  
294 only. This constitutes the starting point of the annual epidemics. Then the fungus switches to poplar leaves  
295 and performs several rounds of infection until leaf-fall. Each infected leaf produces thousands of spores that  
296 are wind-dispersed. In our case study,  $u(t, x_s)$  is the density of fungi infection at time  $t$  at point  $x$  on a poplar  
297 leaf. Each leaf has a carrying capacity of 750 lesions, Appendix E).

298 All along the valley, the Durance River is bordered by a nearly continuous riparian forest of wild poplars  
299 (*Populus nigra*). The annual epidemic on poplars thus spreads downstream through the riparian stands,  
300 mimicking a one-dimension biological invasion (Xhaard et al., 2012). A previous genetic study showed that  
301 the epidemic was indeed initiated in an upstream location where poplars and larchs coexist (Prelles) and  
302 progresses along the valley (Becheler et al., 2016). In fall, the corridor is cleared for disease after leaf-fall. At  
303 62 km downstream of the starting point of the epidemics, the Serre-Ponçon dam represents a shift point in the  
304 valley topology, with a steep-sided valley upstream and a larger riparian zone downstream. This delimitation  
305 led us to consider 2 values of growth rates  $r$  along the one-dimensional domain:  $r_{\text{up}}$  and  $r_{\text{dw}}$  (see Appendix  
306 D for details).

### 307 4.2 Monitoring of an annual epidemic wave

308 In 2008, rust incidence was monitored every three weeks from July to November at 12 sites evenly distributed  
309 along the valley (Figure 3). Sites were inspected during seven rounds of surveys. For a unique date (Oct. 22),  
310 the raw sampling was densified with 45 sites monitored instead of 12. We focused on young poplar trees (up



311 to 2m high) growing on the stands by the riverside.

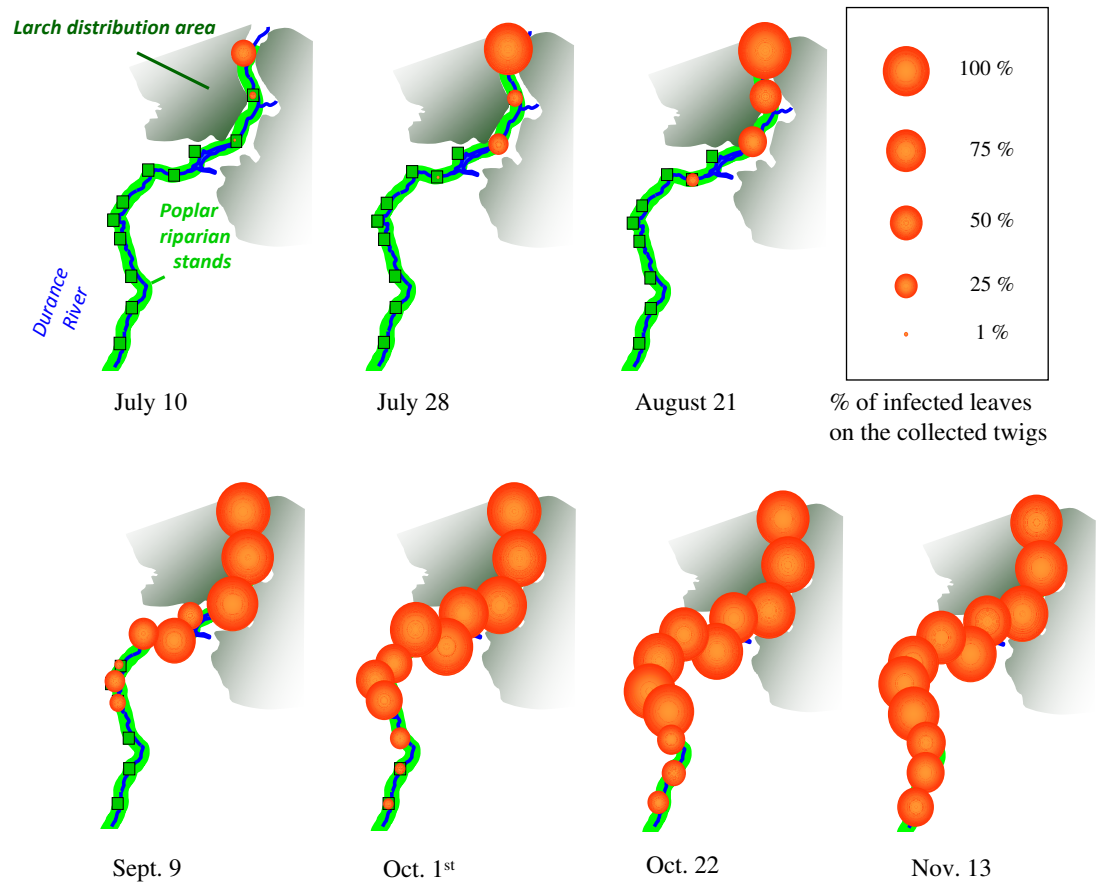

Figure 3: Poplar rust epidemic wave along the Durance River valley in 2008. The larch distribution area is represented in dark green, wild poplar riparian stands in pale green. The 12 study sites are represented by the green squares. Orange dots describe the evolution of the poplar rust epidemic through time (7 rounds of disease notation) and space (12 studied sites). Dot size is proportional to rust disease incidence assessed from the refined sampling.

312 Two monitorings were conducted, corresponding to the raw and refined sampling, as described in previous  
313 sections. For the raw sampling, we prospected each site at each date to search for rust disease by inspecting  
314 randomly distributed poplar trees (different trees at different dates for a given site). Depending on rust  
315 incidence and poplar tree accessibility, 40 to 150 trees (mean 74) were checked for disease. Each tree was  
316 inspected through a global scan of the leaves on different twigs until at least one infected leaf was found or  
317 after 30 s of inspection. The tree was denoted infected or healthy, respectively. This survey method amounts  
318 to minutely inspecting 10 leaves per tree, *i.e.* with the same efficiency of disease detection as through the

319 refined sampling (see details of the statistical procedure in Appendix C). The global scan procedure of the  
320 trees leads to equivalently surveying fewer and fewer leaves as the epidemic progresses. Optionally, when at  
321 least one tree was infected, and depending on available time, we carried out a refined sampling to collect more  
322 information on the variance in disease susceptibility (*i.e.* habitat suitability) among the sampling domain.  
323 The refined sampling consisted in randomly sampling 20 twigs on different trees and recording, for each, the  
324 total number of leaves and the number of infected leaves.

### 325 4.3 Dispersal and demographic processes ruling the epidemic wave

326 The inferential framework developed and tested in previous section was used to fit and compare the four  
327 models considered to the real dataset gathered in the Durance River valley and to derive confidence intervals  
328 of the parameters of interest (Appendix D.3). Model selection was used to decipher which dispersal process  
329 was best supported by the data set, for five initial conditions. The large AIC difference in favour of hypothesis  
330  $J_{\text{ExpP}}$  indicates that poplar rust propagules assuredly disperse according to an exponential-power dispersal  
331 kernel along the Durance River valley (Table 3). Note that for all kernels, the five initial conditions lead to  
332 similar estimations. Under the R.D. hypothesis, however, initial conditions can lead to different estimations  
333 because of local optima, but all AIC resulting from the R.D. hypothesis are higher than AIC resulting from  
334 the three dispersal kernels.

Table 3: Model selection for the epidemic of poplar rust along the Durance River valley. The Akaike information criteria are indicated for each model fitted to the real data set. The model best supported by the data is indicated in bold.  $\text{AIC}_{\text{median}}$  and  $\text{AIC}_{\text{sd}}$  represent the median and standard deviation among the AIC obtained from five initial conditions.

| Dispersal                           | $\text{AIC}_{\text{median}}$ | $\text{AIC}_{\text{sd}}$ |
|-------------------------------------|------------------------------|--------------------------|
| $J_{\text{Exp}}$                    | 5476                         | 0.68                     |
| $J_{\text{Gauss}}$                  | 5510                         | 1.03                     |
| <b><math>J_{\text{ExpP}}</math></b> | <b>5179</b>                  | <b>1.32</b>              |
| R.D.                                | 6303                         | 655.60                   |

335 The estimation of the parameters for the best model along with their confidence intervals are summarised  
336 in Table 4. The parameters of the Exponential-power kernel are of prime interest in our study. They firstly  
337 indicate that the mean distance travelled by rust spores is estimated at 2.01 km. Moreover, the mean exponent  
338 parameter  $\tau$  of the Exponential-power kernel is 0.24. This value, much lower than 1, suggests substantial  
339 long-distance dispersal events. We also estimated the growth rates of the poplar rust epidemics along the

340 Durance River valley. From upstream to downstream, their mean estimates are 0.084 and 0.020, respectively.  
 341 The estimate of the parameter of the observation model,  $\gamma$ , is 5.21. This parameter represents how perceived  
 342 probabilities of leaf infection differ among trees from true probabilities. The estimated value of 5.21 indicates  
 343 some variability in the perception of infected leaves, but this variability is moderate because the shape of the  
 344 underlying Beta-Binomial distribution approaches the Binomial distribution (for which perception differences  
 345 are absent) (Figure 4, row 1). By contrast, the estimated value of the micro-scale fluctuation variance  $\sigma^2$   
 346 (1.09) suggests a substantial variability in leaf suitability between twigs. This is evidenced by comparing the  
 347 shape of the estimated Gamma-Binomial distribution with a situation with negligible differences in receptivity  
 348 between twigs (Figure 4, row 2, case  $\sigma^2 = 0.01$ ).

Table 4: Statistical summary of the inference of the parameters for the model best supported by the real data set  $J_{\text{ExpP}}$ . We used the vector of parameters  $\theta$  giving the lowest AIC value in the previous model selection procedure as initial conditions of the R function `mle2`, to obtain maximum likelihood estimates of the vector of parameters  $\hat{\theta}$  and of its matrix of variance-covariance  $\hat{\Sigma}$ . Summary statistics were derived from 1,000 random draws from the multivariate normal distribution with parameters  $\hat{\theta}$  and  $\hat{\Sigma}$  (see Appendix D.3). Columns Estimate,  $q - 2.5\%$  and  $q - 97.5\%$  represent the estimated value of each parameter and the quantiles 2.5% and 97.5%, respectively.

| Parameter       | Description                  | $q - 2.5\%$ | Estimate | $q - 97.5\%$ |
|-----------------|------------------------------|-------------|----------|--------------|
| $r_{\text{up}}$ | Growth rate upstream         | 0.0312      | 0.0844   | 0.191        |
| $r_{\text{dw}}$ | Growth rate downstream       | 0.0114      | 0.0203   | 0.0289       |
| $\lambda$       | Mean dispersal distance      | 1.76        | 2.01     | 2.03         |
| $\tau$          | Kernel exponent              | 0.220       | 0.242    | 0.263        |
| $\gamma$        | Tree perception              | 3.21        | 5.21     | 6.77         |
| $\sigma^2$      | Variance in leaf suitability | 0.987       | 1.09     | 1.21         |

349 Model check consists in testing whether the selected model was indeed able –given the parameter values  
 350 inferred above– to reproduce the observed data describing the epidemic wave that invaded the Durance River  
 351 valley in 2008. To do so, we assessed the coverage rate of the raw sampling data (proportions of infected trees)  
 352 based on their 95%-confidence intervals (Appendix D.4, Figure 5). Over all sampling dates, the mean coverage  
 353 rate is high (0.74), which indicates that the model indeed captures a large part of the strong variability of the  
 354 data.

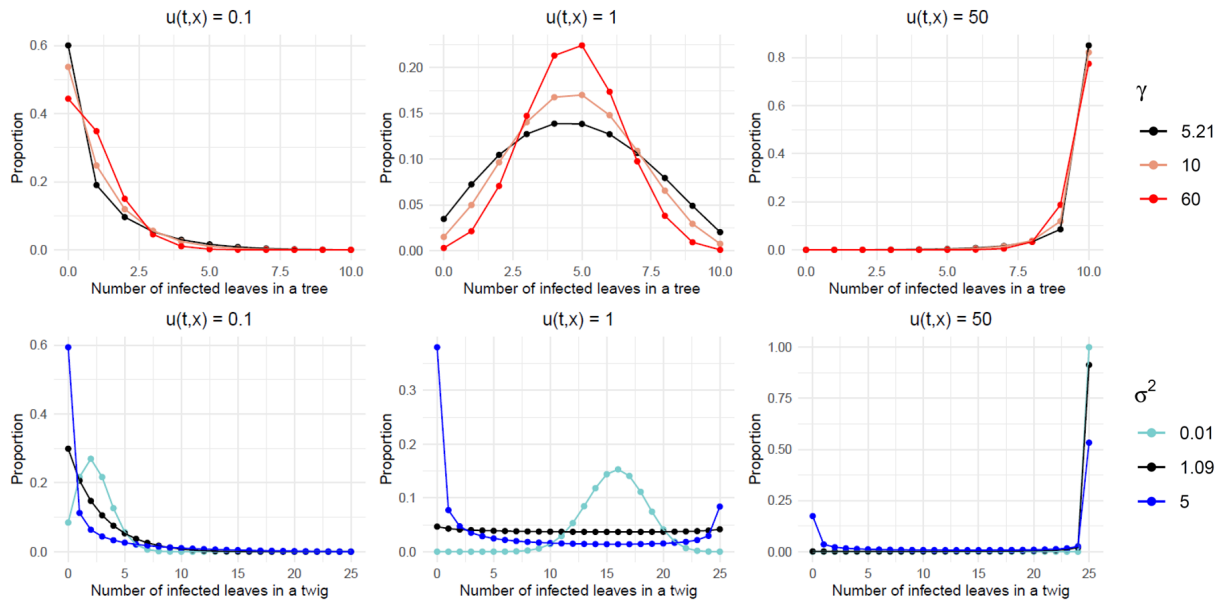

Figure 4: Distributions of the number of infected leaves in a tree and of the number of infected leaves in a twig, for increasing densities of infection  $u(t,x)$ , and contrasted levels of environmental heterogeneity  $\sigma^2$  and  $\gamma$ . The number of infected leaves in a tree follows a Beta-Binomial distribution (Eq. (S8)) with  $\sigma^2 = 1.09$ . Its density is plotted for three tree perceptions  $\gamma$ : 5.21 (estimated value on the real data set), 10 (intermediate value) and 60 for which the Beta-Binomial distribution is approaching a Binomial distribution. The number of infected leaves in a twig follows a Gamma-Binomial distribution (Eq. (S14)). Its density is plotted for three leaf suitabilities  $\sigma^2$ : 1.09 (estimated value on the real data set), 5 (a higher value) and 0.01 a value lowering variability in leaf suitability between twigs (when  $\sigma^2$  tends to 0, all twigs share the same leaf suitability).

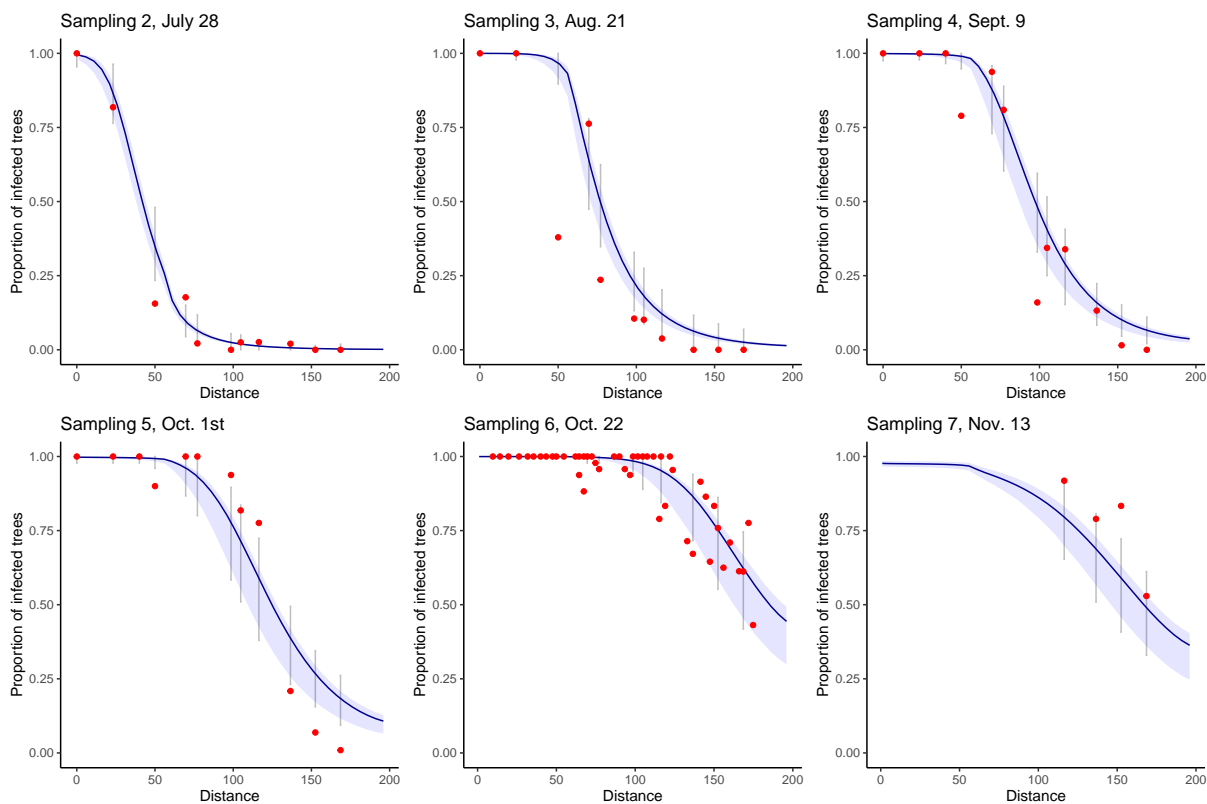

Figure 5: Model check: Coverage rates for the raw sampling. Each sampling date is represented on a separate graph. Sampling 1 is not represented because it corresponds to the initial condition of the epidemics for all simulations. Blue areas correspond to the pointwise 95% confidence envelopes for the proportion of infected trees, grey intervals correspond to the 95% prediction intervals at each site, *i.e.* taking into account the observation laws given the proportion of infected trees. Red points correspond to the observed data. Only four observations are available for sampling 7 because at this date (November 13) the leaves had already fallen from the trees located upstream the valley.

## 355 5 Discussion

356 This study combines mechanistic and statistical modelling to jointly infer the demographic and dispersal  
357 parameters leading to a biological invasion. A strength of the mechanistic model was to combine population  
358 growth with several dispersal processes with the aim to grasp a large diversity of processes possibly underlying  
359 invasion. The mechanistic model was coupled to a sound statistical model that considers different types of  
360 count data, which broaden the approach. Although the framework is generic, it was tuned to fit the annual  
361 spread of the poplar rust fungus *M. larici-populina* along the Durance River valley. This valley channels  
362 every year the spread of an epidemic along a one-dimensional corridor of nearly 200 km (Xhaard et al., 2012;  
363 Becheler et al., 2016). The monitoring we performed enables to build a comprehensive data set at a large  
364 spatial scale, which is mandatory to precisely infer the shape of the tail of dispersal kernels (Ferrandino, 1996;  
365 Kuparinen et al., 2007). Before applying the developed approach to our real dataset, detailed simulations were  
366 designed to prove that the demographic model can be confidently selected and its parameter values reliably  
367 inferred. A main originality in the statistical treatment of the data was to consider that habitat suitability  
368 and disease perception can vary over the sampling domain. This encapsulates a large part of the variability  
369 in the biological or observation processes and thus provides robust estimates of the parameters of biological  
370 interest.

### 371 5.1 Estimation of the dispersal kernel of the poplar rust

372 This study provides the first reliable estimation of the dispersal kernel of the poplar rust fungus. Dispersal  
373 kernels are firstly defined by their scale, which can be taken to correspond to the mean dispersal distance.  
374 The mean dispersal distance obtained from the best model is 2.01 km with a 95% confidence interval ranging  
375 from 1.76 to 2.27 km. Although few such estimates are available, the mean dispersal distance is likely much  
376 higher for fungal plant pathogens than for insect-transmitted pathogens. A non-systematic literature review  
377 identified only eight studies reporting dispersal kernels for plant pathogens that used data gathered in exper-  
378 imental designs extending over regions bigger than 1 km (Fabre et al., 2021). The mean dispersal distance of  
379 the four fungal pathosystems listed by these authors are 213 m for the ascospores of *Mycosphaerella fijiensis*,  
380 490 m for the ascospores of *Leptosphaeria maculans*, 860 m for *Podosphaera plantaginis* and from 1380 to

381 2560 m for *Hymenoscyphus fraxineus*. Our estimates for poplar rust are in the same range as the one obtained  
382 for *Hymenoscyphus fraxineus*, the causal agent of Chalara ash dieback, at regional scale (Grosdidier et al.,  
383 [2018](#)).

384

385 Dispersal kernels can be further defined by their shape, which informs the fatness of their tails. We show  
386 that the spread of poplar rust is best described by a fat-tailed Exponential-power kernel. The thin-tailed ker-  
387 nels considered (Gaussian and exponential kernels) were clearly rejected by model selection. These results are  
388 in accordance with the high dispersal ability and the long-distance dispersal events evidenced in this species  
389 by population genetics analyses (Barrès et al., [2008](#); Becheler et al., [2016](#)). Rust fungi are well-known to be  
390 wind dispersed over long distances (Brown and Hovmøller, [2002](#); Aylor, [2003](#)), some studies explaining the  
391 spread of rust disease at the global scale through the air mass movement (Pan et al., [2006](#)). Contrary to other  
392 wind-borne fungi like ascomycetes (which actively project the sexually derived spores, Roper et al., [2010](#)),  
393 spores are released passively through air current, which results in both a high amount of auto-infection and fre-  
394 quent events of long-distance dispersal. Recently, Severns et al. ([2019](#)) gathered experimental and simulation  
395 evidence that supports that wheat stripe rust spread supports theoretical scaling relationships from power law  
396 properties, another family of fat-tail dispersal kernel. Fat-tail kernels have also been identified in other plant  
397 pathogens. For example, Rieux et al. ([2014](#)) and Bousset et al. ([2015](#)) found evidence for Exponential-power  
398 kernels with fat-tailed for the causal agents of Black Sigatoka and Phoma stem canker, respectively. More  
399 broadly, four of these eight studies listed by Fabre et al. ([2021](#)) lent support to fat-tailed kernels, including  
400 plant pathogens as diverse as viruses, fungi and oomycetes. Many aerially dispersed pathogens are likely  
401 to display frequent long-distance flights as soon as their life cycles include propagules. Typically, it can be  
402 spore propagules but also insect vectors such as aphids escaping from plant canopy into turbulent air layer  
403 (Ferrandino, [1993](#); Pan et al., [2010](#)).

404

## 405 5.2 Effect of fat-tailed dispersal kernels on eco-evolutionary dynamics

406 The dynamics produced by the mechanistic integro-differential models we use strongly depends on the tail  
407 of the dispersal kernel. Namely, when the equation is homogeneous (*i.e.* when the model parameters do  
408 not vary in space, leading to  $r(x) = r$ ), it is well known that for any thin-tailed dispersal kernel  $J$  such  
409 that  $\int_{\mathbb{R}} J(z)e^{\lambda|z|}dz < +\infty$  for some  $\lambda > 0$ , the dynamics of  $u(t, x)$  is well explained using a particular  
410 solution called travelling wave. In this case, the invading front described by the solution  $u(t, x)$  moves at a  
411 constant speed (Aronson and Weinberger, 1978). For a fat-tailed kernel, these particular solutions do not  
412 exist anymore and the dynamic of  $u(t, x)$  describes an accelerated invasion process (Medlock and Kot, 2003;  
413 Garnier, 2011; Bouin et al., 2018). Here, we show that the dynamics of the poplar rust is better described as  
414 an accelerated invasion process rather than a front moving at a constant speed. Such accelerating wave at the  
415 epidemic front has been identified for several fungal plant pathogens dispersed by wind, including *Puccinia*  
416 *striiformis* and *Phytophthora infestans* the wheat stripe rust and the potato late blight, respectively (Mundt  
417 et al., 2009). However, it should be stated that fat-tailed kernels are not always associated with accelerated  
418 invasion processes. Indeed, fat-tailed kernels can be further distinguished depending on whether they are  
419 regularly varying (*e.g.* power law kernels) or rapidly varying (*e.g.* Exponential-power kernels) (Klein et al.,  
420 2006). Mathematically, it implies that power law kernels decrease even more slowly than any Exponential-  
421 power function. Biologically, fat-tailed Exponential-power kernels display rarer long-distance dispersal events  
422 than power law kernels. On the theoretical side, the kernel's properties subtly interact with demographic  
423 mechanisms such as Allee effects to possibly cancel the acceleration of invasion. With weak Allee effects (*i.e.*  
424 the growth rate is density dependent but still positive), no acceleration occurs with rapidly varying kernel  
425 whereas an acceleration could be observed for some regularly varying kernels, depending on the strength of  
426 the density dependence (Alfaro and Coville, 2017; Bouin et al., 2021). For strong Allee effects (*i.e.* a negative  
427 growth rate at low density), no acceleration can be observed for all possible kernels (Chen, 1997). On the  
428 applied side, whether or not the epidemic wave is accelerating sharply impacts the control strategies of plant  
429 pathogens (Filipe et al., 2012; Ojiambo et al., 2015; Fabre et al., 2021).



### 430 **5.3 Confidence in the inference of the dispersal process**

431 The inference framework we developed is reasonably efficient in estimating the dispersal process with frequent  
432 long-distance dispersal events as generated by Exponential-power dispersal kernels. The numerical exper-  
433 iments clearly show that the lower the exponent parameter  $\tau$  of the Exponential-power kernel, the higher  
434 the confidence in its selection. Conversely, the identification of the dispersal process is less accurate with  
435 the Gaussian kernel. Its correct identification requires densifying the sampling. We clearly observed that  
436 integro-differential models with Gaussian dispersal kernel on the one hand and reaction-diffusion equation on  
437 the other hand are well identified with our estimation procedure when the time and space sampling is dense  
438 enough. This result may at first appear striking as a common belief tends to consider that diffusion amounts  
439 to a Gaussian dispersal kernel. However, these two models represent different movement processes (Othmer  
440 et al., 1988).

441 In addition, classical macroscopic diffusion, which is mainly based on Brownian motion (Othmer et al.,  
442 1988), often ignores the inherent variability among individuals' capacity of movements and as a consequence  
443 does not accurately describe the dispersal of an heterogeneous population (Hapca et al., 2009). While it is  
444 reasonable to assume that a single individual disperses via Brownian motion, this assumption hardly extends  
445 to all individuals in the population. Accordingly, we believe that integro-differential models are better suited  
446 to take into account inter-individual behaviour as the dispersal kernel explicitly models the redistribution of  
447 individuals.

### 448 **5.4 Robustness and portability of the method**

449 A strength of the approach proposed is the detailed description of the observation laws in the statistical  
450 model. The derivation of their probability density functions allows to obtain an analytical expression of  
451 the likelihood function and, as such, to use simple and fast maximum likelihood methods. However, the  
452 framework of hierarchical statistical models (Cressie et al., 2009), whose inference is often facilitated by  
453 Bayesian approaches, could likely be mobilised to improve model fit. In particular, although the coverage  
454 rate of the tree sampling was correct, it could be further improved by relaxing some hypotheses. The orange-  
455 coloured uredinia being easily seen on green leaves, we assumed that the persons in charge of the sampling

456 perfectly detect the disease as soon as a single uredinia is present on a leaf. However, even in this context,  
457 observation errors are likely present in our dataset as in any large spatio-temporal study. The latent variables  
458 used in hierarchical models are best suited to handle the fact that a tree observed to be healthy can actually  
459 be infected. False detection of infection could also be taken into account. This could make sense as a sister  
460 species, *M. alli-populina*, not easily discernible from *M. larici-populina* in the field, can also infect poplar  
461 leaves. This species can predominate locally in the downstream part of the Durance River valley. This could  
462 have led to over-estimate the disease severity at some locations. Yet, all infected leaves from twigs were  
463 collected and minutely inspected in the lab under a Stereo Microscope (25 magnification) to check for species  
464 identification. More generally, the statistical part of the mechanistic-statistical approaches developed could  
465 be transposed to a wide range of organisms and sampling types. The two distinct types of sampling (sampling  
466 of random leaves in trees, and of leaves grouped within twigs) apply to a wide range of species, which local  
467 distribution is aggregated into patches randomly scattered across a study site. Any biological system with  
468 two such distinct sampling types (as described in Figure 1) would fit the proposed statistical model, all the  
469 more that one can for example scale up the sampling by considering the plant (instead of the leaf) as the  
470 basic unit. Moreover, the framework naturally copes with the diversity of sampling schemes on the ground  
471 such as the absence of one sample type for all or part of the sampled sites and dates.

472 The mechanistic part of the model could also handle a wider diversity of hypotheses. First, the model  
473 can be adapted to take into account a wider range of dispersal kernels, such as regularly varying kernels (see  
474 above). Second, the model can also easily be adapted to take into account time and space discontinuities  
475 of its parameters. Typically, one may easily assume that the growth rate depends on daily meteorological  
476 variables. Finally, we ignore the influence of the local fluctuations of the population size on the macro-scale  
477 density of the population when stochastic fluctuations can influence epidemic dynamics Rohani et al., 2002.  
478 Here, we neglect this influence by considering that the average population size is relevant when habitat units  
479 are aggregated. Relaxing this hypothesis could be achieved by incorporating stochastic integro-differential  
480 equations. The inference of such models is currently a front of research.

## 481 5.5 Future directions

482 Allee effect can modulate the invasion dynamics of certain species (Dennis, 1989; Lewis and Kareiva, 1993).  
483 They could be introduced in our framework *via* a new parameter modulating the population growth depending  
484 on its size. It has been included in an earlier version of this work but led to practical identifiability problems  
485 between this Allee parameter and the population growth rates. We face a limitation caused by the type of  
486 data used. Incorporating genetic data should allow to overcome this difficulty.

487 As biological invasions are regularly observed retrospectively, carrying out spatio-temporal monitoring is  
488 often highly difficult, when possible. The absence of longitudinal temporal data makes model inference very  
489 difficult, in particular for its propensity to properly disentangle the effect of growth rate and dispersal. Here  
490 again, gathering genetic data may be relevant as colonisation and demographic effects generate their own  
491 specific genetic signatures (Miller et al., 2020). Furthermore, genetic data could help to identify the dispersal  
492 kernel underlying the invasion process. Indeed, the population will exhibit an erosion of its neutral diversity  
493 with a thin-tailed kernel (Edmonds et al., 2004; Hallatschek et al., 2007). Conversely, genetic diversity can  
494 be preserved all along the invasion front with a fat-tailed kernel, because of the long-distance dispersal of  
495 individuals from the back of the front, where genetic diversity is conserved (Fayard et al., 2009; Bonnefon  
496 et al., 2014).

## 497 6 Acknowledgements

498 We warmly thank all the collectors who participated in the monitoring of the poplar rust disease spread along  
499 the Durance River valley: Audrey Andanson, Béranger Bertin, Olivier Caël, Bénédicte Fabre, Christine Gehin,  
500 Claude Husson, Benoît Marçais, and Agathe Vialle. We also thank Benoît Marçais for fruitful discussions  
501 on disease monitoring, Bénédicte Fabre for the calculus of the density in uredinia on a poplar leaf, and  
502 Fabrice Elegbede for advices on statistical analyses. This work was supported by grants from the French  
503 National Research Agency (ANR-09-BLAN-0145, EMILE project; ANR-18-CE32-0001, CLONIX2D project;  
504 ANR-14-CE25-0013, project NONLOCAL, ANR-11-LABX-0002-01, Cluster of Excellence ARBRE; 20-PCPA-  
505 0002, BEYOND project). Constance Xhaard was supported by a PhD fellowship from the French Ministry

506 of Education and Research (MESR) and by Postdoc fellowship from the French National Research Agency  
507 (ANR-09-BLAN-0145, EMILE project) . Méline Saubin was supported by a PhD fellowship from INRAE and  
508 the French National Research Agency (ANR-18-CE32-0001, CLONIX2D project).

## 509 **Competing interests**

510 The authors declare that they have no known competing financial interests nor personal relationships that  
511 could have appeared to influence the work reported in this paper.

## 512 **Author contributions**

513 Constance Xhaard, Pascal Frey, and Fabien Halkett supervised the disease monitoring. Jérôme Coville,  
514 Frédéric Fabre, Fabien Halkett, and Samuel Soubeyrand conceived and designed the study. Jérôme Coville  
515 provided a mathematical expertise on modelling long range dispersal as well as codes of simulation for the  
516 mechanistic models. Samuel Soubeyrand established the observation laws. Frédéric Fabre supervised the  
517 statistical analyses. Constance Xhaard and Fabien Halkett did preliminary analyses. Méline Saubin updated  
518 the code and did the statistical analyses. Jérôme Coville, Frédéric Fabre, Fabien Halkett, Méline Saubin,  
519 and Samuel Soubeyrand contributed to the writing of the manuscript. All authors read and approved the  
520 manuscript.

## 521 **Data accessibility**

522 R and C++ scripts for model simulations and statistical analyses, as well as count data for the biological applic-  
523 ation are available on a public GitLab repository: [https://gitlab.com/saubin.meline/mechanistic-statistical-](https://gitlab.com/saubin.meline/mechanistic-statistical-model)  
524 [model](https://gitlab.com/saubin.meline/mechanistic-statistical-model).

## References

- 525
- 526 Alfaro, M. and Coville, J. (2017). Propagation phenomena in monostable integro-differential equations:  
527 Acceleration or not? *Journal of Differential Equations*, 263(9):5727–5758.
- 528 Allaire, G. (2005). *Analyse numérique et optimisation : une introduction à la modélisation mathématique et*  
529 *à la simulation numérique*. Editions Ecole Polytechnique.
- 530 Aronson, D. G. and Weinberger, H. F. (1978). Multidimensional nonlinear diffusion arising in population  
531 genetics. *Advances in Mathematics*, 30(1):33–76.
- 532 Aylor, D. E. (2003). Spread of plant disease on a continental scale: Role of aerial dispersal of pathogens.  
533 *Ecology*, 84(8):1989–1997.
- 534 Barrès, B., Halkett, F., Dutech, C., Andrieux, A., Pinon, J., and Frey, P. (2008). Genetic structure of the  
535 poplar rust fungus *Melampsora larici-populina*: Evidence for isolation by distance in Europe and recent  
536 founder effects overseas. *Infection, Genetics and Evolution*, 8(5):577–587.
- 537 Becheler, R., Xhaard, C., Klein, E., Hayden, K. J., Frey, P., De Mita, S., and Halkett, F. (2016). Genetic  
538 signatures of a range expansion in natura: when clones play leapfrog. *Ecology and Evolution*, 6(18):6625–  
539 6632.
- 540 Berliner, L. M. (2003). Physical-statistical modeling in geophysics. *Journal of Geophysical Research*,  
541 108(24):8776.
- 542 Bialozyt, R., Ziegenhagen, B., and Petit, R. J. (2006). Contrasting effects of long distance seed dispersal on  
543 genetic diversity during range expansion. *Journal of Evolutionary Biology*, 19(1):12–20.
- 544 Bonnefon, O., Coville, J., Garnier, J., Hamel, F., and Roques, L. (2014). The spatio-temporal dynamics of  
545 neutral genetic diversity. *Ecological Complexity*, 20:282–292.
- 546 Bouin, E., Coville, J., and Legendre, G. (2021). Sharp exponent of acceleration in general nonlocal equations  
547 with a weak Allee effect. *arXiv*, pages 1–45.

- 548 Bouin, E., Garnier, J., Henderson, C., and Patout, F. (2018). Thin front limit of an integro-differential  
549 Fisher-KPP equation with fat-tailed kernels. *SIAM Journal on Mathematical Analysis*, 50(3):3365–3394.
- 550 Bourgeois, A., Gaba, S., Munier-Jolain, N., Borgy, B., Monestiez, P., and Soubeyrand, S. (2012). Inferring  
551 weed spatial distribution from multi-type data. *Ecological Modelling*, 226:92–98.
- 552 Bousset, L., Jumel, S., Garreta, V., Picault, H., and Soubeyrand, S. (2015). Transmission of *Leptosphaeria*  
553 *maculans* from a cropping season to the following one. *Annals of applied biology*, 166(3):530–543.
- 554 Broquet, T. and Petit, E. J. (2009). Molecular estimation of dispersal for ecology and population genetics.  
555 *Annual Review of Ecology, Evolution, and Systematics*, 40(1):193–216.
- 556 Brown, J. K. M. and Hovmøller, M. S. (2002). Aerial dispersal of pathogens on the global and continental  
557 scales and its impact on plant disease. *Science's compass*, 297:537–541.
- 558 Chagneau, P., Mortier, F., Picard, N., and Bacro, J. (2011). A hierarchical Bayesian model for spatial  
559 prediction of multivariate non-Gaussian random fields. *Biometrics*, 67(1):97–105.
- 560 Chen, X. (1997). Existence, uniqueness, and asymptotic stability of traveling waves in nonlocal evolution  
561 equations. *Advances in Differential Equations*, 2(1):125–160.
- 562 Clark, J. S., Lewis, M., and Horvath, L. (2001). Invasion by extremes: Population spread with variation in  
563 dispersal and reproduction. *American Naturalist*, 157(5):537–554.
- 564 Clobert, J., Ims, R. A., and Rousset, F. (2004). Causes, mechanisms and consequences of dispersal. In  
565 *Ecology, genetics and evolution of metapopulations*, pages 307–335. Elsevier.
- 566 Cressie, N., Calder, C. A., Clark, J. S., Ver Hoef, J. M., and Wikle, C. K. (2009). Accounting for uncer-  
567 tainty in ecological analysis: The strengths and limitations of hierarchical statistical modeling. *Ecological*  
568 *Applications*, 19(3):553–570.
- 569 Dennis, B. (1989). Allee effects: Population growth, critical density, and the chance of extinction. *Natural*  
570 *Resource Modeling*, 3(4):481–538.

- 571 Dybiec, B., Kleczkowski, A., and Gilligan, C. A. (2009). Modelling control of epidemics spreading by long-  
572 range interactions. *Journal of the Royal Society Interface*, 6(39):941–950.
- 573 Edmonds, C. A., Lillie, A. S., and Cavalli-Sforza, L. L. (2004). Mutations arising in the wave front of an  
574 expanding population. *Proceedings of the National Academy of Sciences*, 101(4):975–979.
- 575 Fabre, F., Coville, J., and Cunniffe, N. J. (2021). Optimising reactive disease management using spatially  
576 explicit models at the landscape scale. In Scott, P. R., Strange, R. N., Korsten, L., and Gullino, M. L.,  
577 editors, *Plant disease and food security in the 21st century*, pages 47–72. Springer International Publishing.
- 578 Fayard, J., Klein, E., and Lefèvre, F. (2009). Long distance dispersal and the fate of a gene from the  
579 colonization front. *Journal of Evolutionary Biology*, 22(11):2171–2182.
- 580 Ferrandino, F. J. (1993). Dispersive epidemic waves: I. Focus expansion within a linear planting. *Phytopath-*  
581 *ology*, 83(8):795.
- 582 Ferrandino, F. J. (1996). Length scale of disease spread: Fact or artifact of experimental geometry. *Phyto-*  
583 *pathology*, 86:806–811.
- 584 Fife, P. C. (1996). An integrodifferential analog of semilinear parabolic PDEs. In *Partial differential equations*  
585 *and applications*, volume 177 of *Lecture Notes in Pure and Appl. Math.*, pages 137–145. Dekker, New York.
- 586 Filipe, J. A. N., Cobb, R. C., Meentemeyer, R. K., Lee, C. A., Valachovic, Y. S., Cook, A. R., Rizzo, D. M.,  
587 and Gilligan, C. A. (2012). Landscape epidemiology and control of pathogens with cryptic and long-distance  
588 dispersal: Sudden Oak death in northern Californian forests. *PLoS Computational Biology*, 8(1):e1002328.
- 589 Fisher, R. A. (1937). The wave of advance of advantageous genes. *Annals of Eugenics*, 7:355–369.
- 590 Gandon, S. and Michalakis, Y. (2002). Local adaptation, evolutionary potential and host parasite coevolution:  
591 Interactions between migration, mutation, population size and generation time. 15(1):451–462.
- 592 Garnier, J. (2011). Accelerating solutions in integro-differential equations. *SIAM J. Math. Anal.*, 43:1955–  
593 1974.

- 594 Georgescu, V., Desassis, N., Soubeyrand, S., Kretzschmar, A., and Senoussi, R. (2014). An automated MCEM  
595 algorithm for hierarchical models with multivariate and multitype response variables. *Communications in*  
596 *Statistics - Theory and Methods*, 43(17):3698–3719.
- 597 Gotway, C. A. and Young, L. J. (2002). Combining incompatible spatial data. *Journal of the American*  
598 *Statistical Association*, 97(458):632–648.
- 599 Grosdidier, M., Ioos, R., Husson, C., Cael, O., Scordia, T., and Marçais, B. (2018). Tracking the invasion:  
600 dispersal of *Hymenoscyphus fraxineus* airborne inoculum at different scales. *FEMS microbiology ecology*,  
601 94(5):1–11.
- 602 Hallatschek, O. and Fisher, D. S. (2014). Acceleration of evolutionary spread by long-range dispersal. *Pro-*  
603 *ceedings of the National Academy of Sciences*, 111(46):E4911–E4919.
- 604 Hallatschek, O., Hersen, P., Ramanathan, S., and Nelson, D. R. (2007). Genetic drift at expanding frontiers  
605 promotes gene segregation. *Proceedings of the National Academy of Sciences*, 104(50):19926–19930.
- 606 Hapca, S., Crawford, J. W., and Young, I. M. (2009). Anomalous diffusion of heterogeneous populations  
607 characterized by normal diffusion at the individual level. *Journal of the Royal Society Interface*, 6(30):111–  
608 122.
- 609 Hefley, T. J., Hooten, M. B., Russell, R. E., Walsh, D. P., and Powell, J. A. (2017). When mechanism matters:  
610 Bayesian forecasting using models of ecological diffusion. *Ecology Letters*, 20(5):640–650.
- 611 Hutson, V., Martinez, S., Mischaikow, K., and Vickers, G. T. (2003). The evolution of dispersal. *Journal of*  
612 *Mathematical Biology*, 47(6):483–517.
- 613 Ibrahim, K. M., Nichols, R. A., and Hewitt, G. M. (1996). Spatial patterns of genetic variation generated by  
614 different forms of dispersal during range expansion. *Heredity*, 77:282–291.
- 615 Klein, E., Lavigne, C., Picault, H., Renard, M., and Gouyon, P. H. (2006). Pollen dispersal of oilseed rape:  
616 Estimation of the dispersal function and effects of field dimension. *Journal of Applied Ecology*, 43(1):141–  
617 151.



- 618 Kolmogorov, A. N., Petrovsky, I. G., and Piskunov, N. S. (1937). Étude de l'équation de la diffusion avec  
619 croissance de la quantité de matière et son application à un problème biologique. *Bulletin Université d'État*  
620 *à Moscow (Bjul. Moskowskogo Gos. Univ)*, pages 1–26.
- 621 Kot, M., Lewis, M. A., and van den Driessche, P. (1996). Dispersal data and the spread of invading organisms.  
622 *Ecology*, 77(7):2027–2042.
- 623 Kuparinen, A., Snäll, T., Vänskä, S., and O'Hara, R. B. (2007). The role of model selection in describing  
624 stochastic ecological processes. *Oikos*, 116(6):966–974.
- 625 Lewis, M. A. and Kareiva, P. (1993). Allee dynamics and the spread of invading organisms. *Theoretical*  
626 *Population Biology*, 42:141–158.
- 627 Louvrier, J., Papaix, J., Duchamp, C., and Gimenez, O. (2020). A mechanisticstatistical species distribution  
628 model to explain and forecast wolf (*Canis lupus*) colonization in South-Eastern France. *Spatial Statistics*,  
629 36:100428.
- 630 Macdonald, D. W. and Johnson, D. D. P. (2001). Dispersal in theory and practice: consequences for con-  
631 servation biology. In Clober, T. J., Danchin, E., Dhondt, A. A., and Nichols, J. D., editors, *Dispersal*,  
632 chapter 25, pages 361–374. Oxford University Press, Oxford, UK.
- 633 Maupetit, A., Larbat, R., Pernaci, M., Andrieux, A., Guinet, C., Boutigny, A. L., Fabre, B., Frey, P., and  
634 Halkett, F. (2018). Defense compounds rather than nutrient availability shape aggressiveness trait variation  
635 along a leaf maturity gradient in a biotrophic plant pathogen. *Frontiers in Plant Science*, 9(September).
- 636 Medlock, J. and Kot, M. (2003). Spreading disease: Integro-differential equations old and new. *Math. Biosci.*,  
637 184(2):201–222.
- 638 Miller, T. E. X., Angert, A. L., Brown, C. D., Lee-Yaw, J. A., Lewis, M., Lutscher, F., Marculis, N. G.,  
639 Melbourne, B. A., Shaw, A. K., Szcs, M., Tabares, O., Usui, T., Weiss-Lehman, C., and Williams, J. L.  
640 (2020). Eco-evolutionary dynamics of range expansion. *Ecology*, 101(10):1–14.
- 641 Mollison, D. (1977). Spatial contact models for ecological and epidemic spread. *J. R. Stat. Ser. B Stat.*  
642 *Methodol.*, 39:283–326.

- 643 Mundt, C. C., Sackett, K. E., Wallace, L. D., Cowger, C., and Dudley, J. P. (2009). Long-distance dispersal  
644 and accelerating waves of disease: Empirical relationships. *American Naturalist*, 173(4):456–466.
- 645 Murray, J. D. (2002). *Mathematical Biology*, volume 17. Springer-Verlag, third edition.
- 646 Nathan, R. (2001). The challenges of studying dispersal. *Trends in Ecology and Evolution*, 16(9):481–483.
- 647 Nathan, R., Klein, E., Robledo-Arnuncio, J. J., and Revilla, E. (2012). 15 - Dispersal kernels: Review. In  
648 Clobert, J., Baguette, M., Benton, T. G., and Bullock, J. M., editors, *Dispersal ecology and evolution*, pages  
649 186–210. Oxford.
- 650 Nathan, R., Perry, G., Cronin, J. T., Strand, A. E., and Cain, M. L. (2003). Methods for estimating long-  
651 distance dispersal. *Nature ecology & evolution*, 103(2):261–273.
- 652 Nembot Fomba, C. G., Ten Hoopen, G. M., Soubeyrand, S., Roques, L., Ambang, Z., and Takam Soh, P.  
653 (2021). Parameter estimation in a PDE model for the spatial spread of cocoa black pod disease. *Bulletin  
654 of Mathematical Biology*, 83:1–28.
- 655 Nichols, R. A. and Hewitt, G. M. (1994). The genetic consequences of long distance dispersal during coloniz-  
656 ation. *Heredity*, 72:312–317.
- 657 Ojiambo, P. S., Gent, D. H., Quesada-Ocampo, L. M., Hausbeck, M. K., and Holmes, G. J. (2015). Epidemi-  
658 ology and population biology of *Pseudoperonospora cubensis* : A model system for management of downy  
659 mildews. *Annual Review of Phytopathology*, 53(1):223–246.
- 660 Okubo, A. and Levin, S. A. (2002). *Diffusion and Ecological Problems – Modern Perspectives*. Second edition,  
661 Springer-Verlag, New York.
- 662 Othmer, H. G., Dunbar, S. R., and Alt, W. (1988). Models of dispersal in biological systems. *Journal of  
663 mathematical biology*, 26(3):263–298.
- 664 Pan, Z., Li, X., Yang, X. B., Andrade, D., Xue, L., and McKinney, N. (2010). Prediction of plant diseases  
665 through modelling and monitoring airborne pathogen dispersal. *CAB Reviews: Perspectives in Agriculture,  
666 Veterinary Science, Nutrition and Natural Resources*, 5(018).

- 667 Pan, Z., Yang, X. B., Pivonia, S., Xue, L., Pasken, R., and Roads, J. (2006). Long-term prediction of soybean  
668 rust entry into the continental United States. *Plant Disease*, 90(7):840–846.
- 669 Papaix, J., Soubeyrand, S., Bonnefon, O., Walker, E., Louvrier, J., Klein, E., and Roques, L. (2022). Inferring  
670 mechanistic models in spatial ecology using a mechanisticstatistical approach. In *Statistical Approaches for*  
671 *Hidden Variables in Ecology*, pages 69–95. Wiley.
- 672 Petit, R. J. (2004). Biological invasions at the gene level. *Diversity and Distributions*, 10(3):159–165.
- 673 Petit, R. J. (2011). Early insights into the genetic consequences of range expansions. *Heredity*, 106:203–204.
- 674 R Core Team (2018). R: A language and environment for statistical computing.
- 675 Rieux, A., Lenormand, T., Carlier, J., De Lapeyre de Bellaire, L., and Ravigné, V. (2013). Using neutral cline  
676 decay to estimate contemporary dispersal: A generic tool and its application to a major crop pathogen.  
677 *Ecology Letters*, 16(6):721–730.
- 678 Rieux, A., Soubeyrand, S., Bonnot, F., Klein, E. K., Ngando, J. E., Mehl, A., Ravigne, V., Carlier, J.,  
679 and Bellaire, L. (2014). Long-distance wind-dispersal of spores in a fungal plant pathogen: Estimation of  
680 anisotropic dispersal kernels from an extensive field experiment. *PLoS ONE*, 9(8):e103225.
- 681 Ritz, C., Baty, F., Streibig, J. C., and Gerhard, D. (2015). Dose-Response analysis using R. *PLOS ONE*,  
682 10(12).
- 683 Rohani, P., Keeling, M. J., and Grenfell, B. T. (2002). The interplay between determinism and stochasticity  
684 in childhood diseases. *The American Naturalist*, 159:469–481.
- 685 Roper, M., Seminara, A., Bandi, M. M., Cobb, A., Dillard, H. R., and Pringle, A. (2010). Dispersal of fungal  
686 spores on a cooperatively generated wind. *Proceedings of the National Academy of Sciences of the United*  
687 *States of America*, 107(41):17474–17479.
- 688 Roques, L., Soubeyrand, S., and Rousset, J. (2011). A statistical-reaction-diffusion approach for analyzing  
689 expansion processes. *Journal of Theoretical Biology*, 274(1):43–51.

- 690 Roques, L., Walker, E., Franck, P., Soubeyrand, S., and Klein, E. K. (2016). Using genetic data to estimate  
691 diffusion rates in heterogeneous landscapes. *Journal of Mathematical Biology*, 73:397–422.
- 692 Savary, S., Willocquet, L., Pethybridge, S. J., Esker, P., McRoberts, N., and Nelson, A. (2019). The global  
693 burden of pathogens and pests on major food crops. *Nature ecology & evolution*, 3(3):430–439.
- 694 Severns, P. M., Sackett, K. E., Farber, D. H., and Mundt, C. C. (2019). Consequences of long-distance  
695 dispersal for epidemic spread: Patterns, scaling, and mitigation. *Plant Disease*, 103(2):177–191.
- 696 Shigesada, N. and Kawasaki, K. (1997). *Biological invasions: Theory and practice*. Oxford University Press,  
697 UK.
- 698 Soubeyrand, S., de Jerphanion, P., Martin, O., Saussac, M., Manceau, C., Hendrikx, P., and Lannou, C.  
699 (2018). Inferring pathogen dynamics from temporal count data: the emergence of *Xylella fastidiosa* in  
700 France is probably not recent. *New Phytologist*, 219:824–836.
- 701 Soubeyrand, S., Enjalbert, J., Sanchez, A., and Sache, I. (2007). Anisotropy, in density and in distance,  
702 of the dispersal of yellow rust of wheat: experiments in large field plots and estimation. *Phytopathology*,  
703 97:1315–1324.
- 704 Soubeyrand, S., Laine, A. L., Hanski, I., and Penttinen, A. (2009a). Spatio-temporal structure of host-  
705 pathogen interactions in a metapopulation. *The American Naturalist*, 174(3):308–320.
- 706 Soubeyrand, S., Neuvonen, S., and Penttinen, A. (2009b). Mechanical-statistical modeling in ecology: From  
707 outbreak detections to pest dynamics. *Bull. Math. Bio.*, 71:318–338.
- 708 Soubeyrand, S. and Roques, L. (2014). Parameter estimation for reaction-diffusion models of biological  
709 invasions. *Population Ecology*, 56(2):427–434.
- 710 Soubeyrand, S., Sache, I., Hamelin, F., and Klein, E. K. (2015). Evolution of dispersal in asexual populations:  
711 to be independent, clumped or grouped? *Evolutionary Ecology*, 29:947–963.
- 712 Strange, R. N. and Scott, P. R. (2005). Plant disease: A threat to global food security. *Annual Review of*  
713 *Phytopathology*, 43:83–116.

714 Szymańska, Z., Skrzeczkowski, J., Miasojedow, B., and Gwiazda, P. (2021). Bayesian inference of a non-local  
715 proliferation model. *Royal Society Open Science*, 8(11).

716 Wikle, C. K. (2003a). Hierarchical Bayesian models for predicting the spread of ecological processes. *Ecology*,  
717 84(6):1382–1394.

718 Wikle, C. K. (2003b). Hierarchical models in environmental science. *International Statistical Review*,  
719 71(2):181–199.

720 Xhaard, C., Barrès, B., Andrieux, A., Bousset, L., Halkett, F., and Frey, P. (2012). Disentangling the  
721 genetic origins of a plant pathogen during disease spread using an original molecular epidemiology approach.  
722 *Molecular Ecology*, 21(10):2383–2398.
